# Supplementary material for: Primeres paraules: com aprenen a parlar els nostres fills
Source: MDPI journal article supplement (doi:10.3390/ijms22073311), 2006-01-01
Supplement: s1 [file s1]

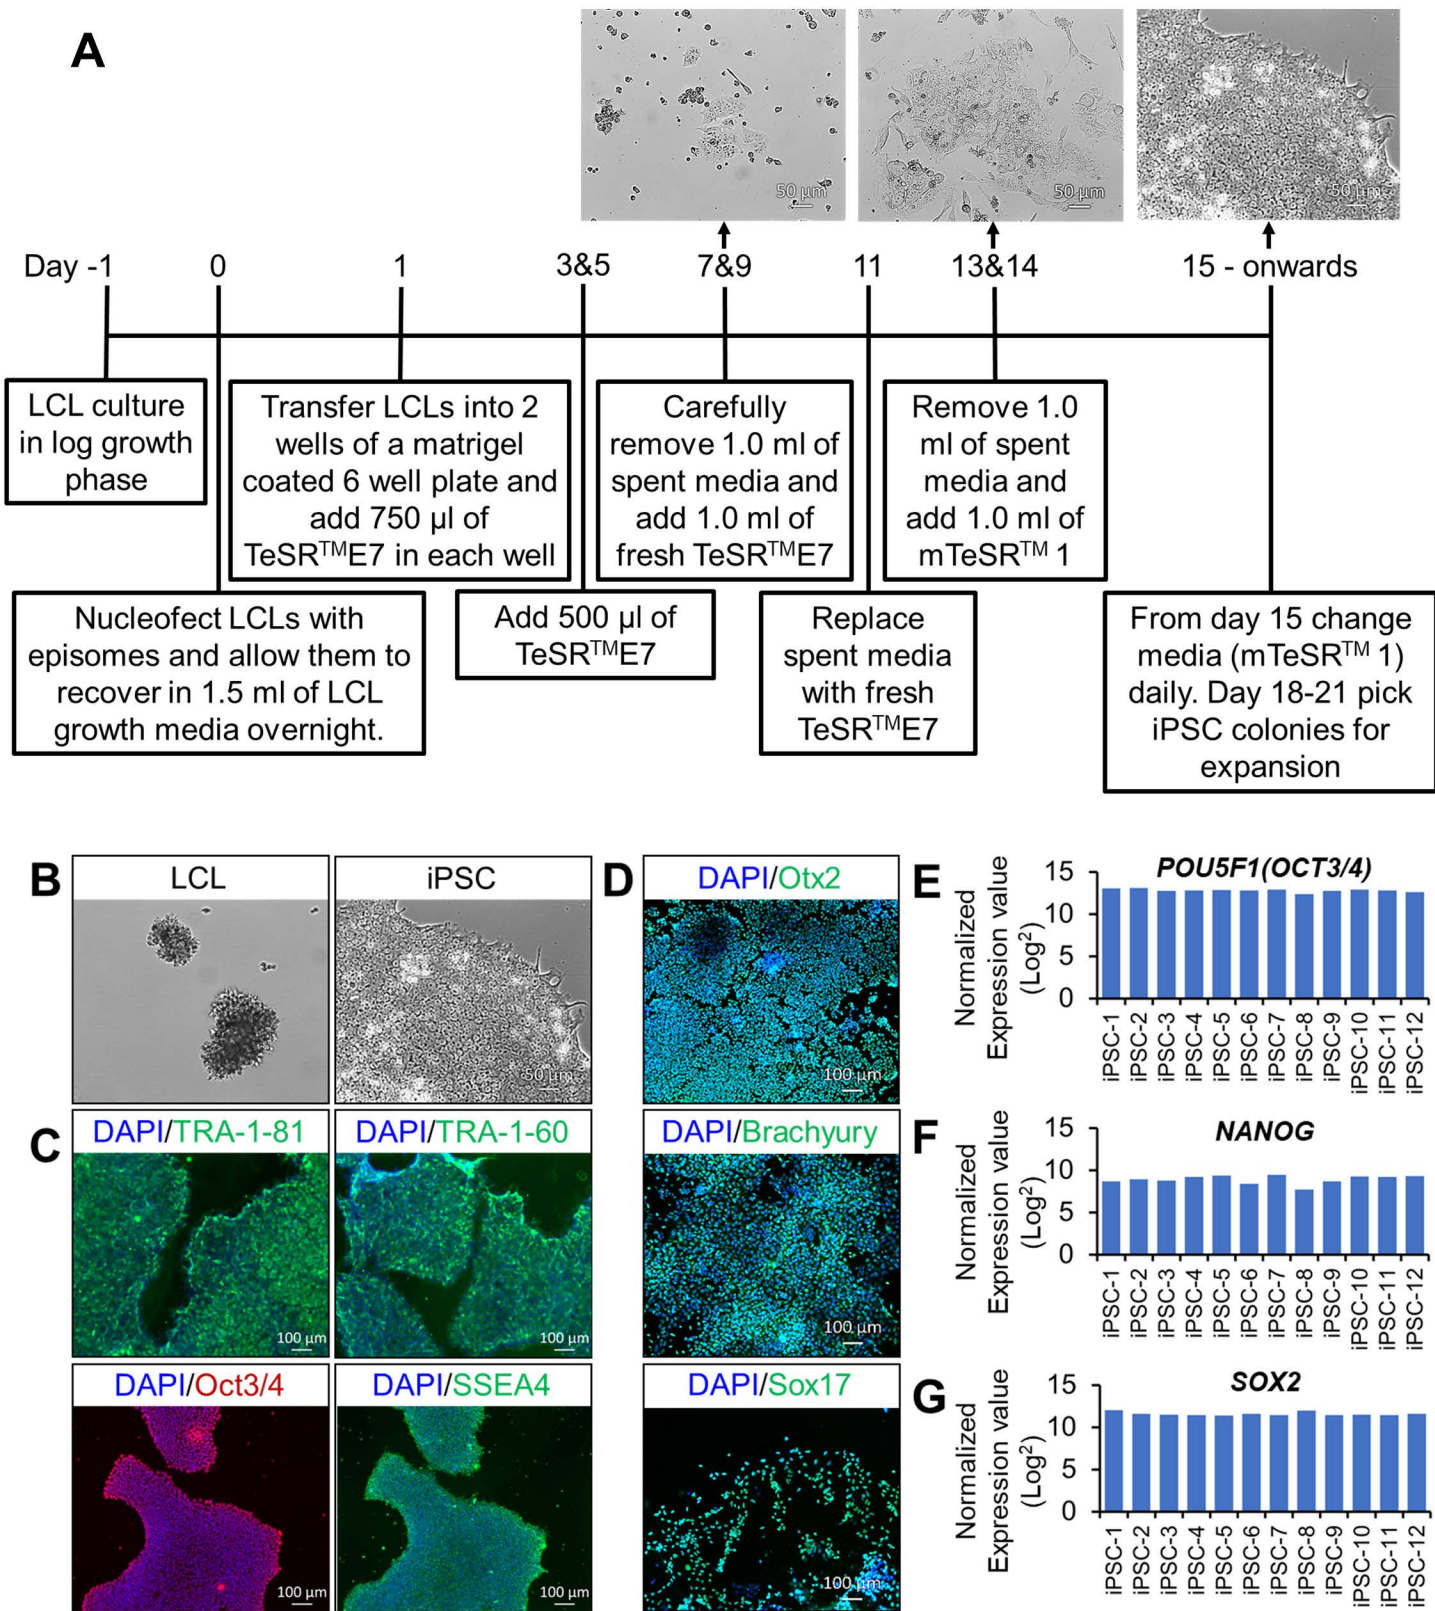

Figure S1. iPSC reprogramming and validation strategy. (A) Schematic diagram outlining the iPSC reprogramming protocol. (B) Bright field images of LCLs and reprogrammed iPSCs. (C) Immunocytochemistry (ICC) analysis of the generated iPSCs showing expression of the pluripotency markers. (D) ICC analysis of the cells of all three embryonic germ layers differentiated from the reprogrammed iPSCs. (E-G) Bar-graphs showing normalized (Log<sup>2</sup>) gene expression values of iPSC core pluripotency markers/genes in all the 12 reprogrammed iPSCs.
